# Supplementary material for: Changing sources and burial of organic carbon in the Chukchi Sea sediments with retreating sea ice over recent centuries
Source: Copernicus journal article supplement (doi:10.5194/cp-19-1305-2023), 2023-07-05
Supplement: Supplementary file 1 [file cp-19-1305-2023-supplement.pdf]

*Supplement of*

## **Changing sources and burial of organic carbon in the Chukchi Sea sediments with retreating sea ice over recent centuries**

**Liang Su et al.**

*Correspondence to:* Jian Ren ([jian.ren@sio.org.cn](mailto:jian.ren@sio.org.cn)) and Jianfang Chen ([jfchen@sio.org.cn](mailto:jfchen@sio.org.cn))

The copyright of individual parts of the supplement might differ from the article licence.

## Supplementary Figures



**Figure S1.** Distribution of (a) TOC, (b) TN, (c)  $\delta^{13}\text{C}_{\text{org}}$ , (d)  $\delta^{15}\text{N}$ , (e)  $\text{IP}_{25}$ , (f) HBI-II, (g) HBI-III, (h) brassicasterol, (i) dinosterol, (j) campesterol and (k)  $\beta$ -sitosterol in the surface sediments of Chukchi Sea and Chukchi Plateau.



**Figure S2.** Box plot of IP<sub>25</sub> concentrations in 3 sediment cores (ARC04-C07, Bai et al. (2022); ARA01B-03MUC, Kim et al. (2019); ARC11-R1, this study). The map in the upper right shows their locations. The central bar in the boxes represents the median value and the green diamond represents the mean value. The rightmost and leftmost of the boxes represent the 75th and 25th percentiles, respectively. Whiskers are the maximum and minimum values within 1.5 times the interquartile range.



**Figure S3.** PIP<sub>25</sub> values calculated from different database *c*-factors from: (a) Xiao *et al.* (2015a) and Smik *et al.* (2016); (b) surface sediments from the Chukchi Sea in this study; (c) from R1 core.



**Figure S4.** (a) Correlation between brassicasterol concentrations and HBI-III concentrations. (b) Correlation between dinosterol concentrations and HBI-III concentrations. (c) Correlation between dinosterol concentrations and brassicasterol concentrations calculated along core R1.



**Figure S5.** Downcore biomarker profiles of (a) brassicasterol concentration, (b) dinosterol concentration, (c)  $\text{IP}_{25}$  concentration and (d) HBI-III concentration in the core ARC04-C07 (Bai et al. 2022), ARA01B-03MUC (Kim et al. 2019) and ARC11-R1.



**Figure S6.** Proportion of organic carbon from each source in surface sediment: (a) terrestrial, (b) pelagic, and (c) sympagic.

## Supplementary Table

**Table S1.** Summary of TOC, H-Print,  $\delta^{13}\text{C}_{\text{org}}$  and proportion of overall organic carbon from each source ( $f_{\text{oc}}$  (%), based on  $\delta^{13}\text{C}_{\text{org}}$  and H-Print, and OC ( $\text{mg g}^{-1}$  d. w., dry weight)) data from surface sediment across the East Siberian Sea and the Chukchi Sea.

| Cruise | Station | Longitude | Latitude | TOC (%) | H-Print (%) | $\delta^{13}\text{C}_{\text{org}}$ (‰) | $f_{\text{sym}}$ (%) | $f_{\text{pela}}$ (%) | $f_{\text{terr}}$ (%) | OC <sub>sym</sub> ( $\text{mg g}^{-1}$ d. w.) | OC <sub>pela</sub> ( $\text{mg g}^{-1}$ d. w.) | OC <sub>terr</sub> ( $\text{mg g}^{-1}$ d. w.) |
|--------|---------|-----------|----------|---------|-------------|----------------------------------------|----------------------|-----------------------|-----------------------|-----------------------------------------------|------------------------------------------------|------------------------------------------------|
| LV77   | LV77-2  | -169.91   | 68.58    | 1.25    | 78.18       | -23.75                                 | 8.95                 | 78.18                 | 12.87                 | 1.12                                          | 9.78                                           | 1.61                                           |
| LV77   | LV77-3  | -172.15   | 68.88    | 2.06    | 80.69       | -23.19                                 | 15.46                | 80.69                 | 3.85                  | 3.18                                          | 16.58                                          | 0.79                                           |
| LV77   | LV77-4  | -174.90   | 69.20    | 2.01    | 81.28       | -22.97                                 | 18.33                | 81.28                 | 0.39                  | 3.68                                          | 16.33                                          | 0.08                                           |
| LV77   | LV77-5  | -173.21   | 69.71    | 1.69    | 81.57       | -23.34                                 | 12.82                | 81.57                 | 5.61                  | 2.17                                          | 13.79                                          | 0.95                                           |
| LV77   | LV77-6  | -173.61   | 72.20    | 1.78    | 70.79       | -23.58                                 | 15.55                | 70.79                 | 13.66                 | 2.76                                          | 12.58                                          | 2.43                                           |
| LV77   | LV77-7  | -173.49   | 71.18    | 0.86    | 76.46       | -24.05                                 | 5.58                 | 76.46                 | 17.96                 | 0.48                                          | 6.59                                           | 1.55                                           |
| LV77   | LV77-8  | -177.48   | 69.59    | 0.95    | 57.98       | -23.48                                 | 24.27                | 57.98                 | 17.75                 | 2.31                                          | 5.52                                           | 1.69                                           |
| LV77   | LV77-9  | 179.86    | 69.59    | 0.60    | 77.77       | -23.80                                 | 8.45                 | 77.77                 | 13.78                 | 0.51                                          | 4.66                                           | 0.83                                           |
| LV77   | LV77-10 | 177.31    | 70.25    | 1.32    | 63.42       | -24.04                                 | 13.15                | 63.42                 | 23.43                 | 1.73                                          | 8.34                                           | 3.08                                           |
| LV77   | LV77-11 | 174.34    | 70.12    | 1.06    | 18.93       | -25.19                                 | 22.14                | 18.93                 | 58.93                 | 2.35                                          | 2.01                                           | 6.26                                           |
| LV77   | LV77-12 | 174.36    | 70.73    | 1.07    | 14.02       | -24.66                                 | 32.52                | 14.02                 | 53.46                 | 3.47                                          | 1.50                                           | 5.70                                           |
| LV77   | LV77-14 | 174.79    | 72.24    | 1.25    | 25.27       | -24.48                                 | 28.70                | 25.27                 | 46.03                 | 3.58                                          | 3.15                                           | 5.73                                           |
| LV77   | LV77-15 | 170.89    | 71.25    | 1.27    | 54.00       | -24.97                                 | 5.30                 | 54.00                 | 40.70                 | 0.67                                          | 6.87                                           | 5.18                                           |
| LV77   | LV77-16 | 166.04    | 70.08    | 0.45    | 5.07        | -25.50                                 | 25.67                | 5.07                  | 69.26                 | 1.16                                          | 0.23                                           | 3.13                                           |
| LV77   | LV77-17 | 166.22    | 71.01    | 0.26    | 0.00        | -25.67                                 | 26.21                | 0.00                  | 73.79                 | 0.67                                          | 0.00                                           | 1.89                                           |
| LV77   | LV77-18 | 166.54    | 71.67    | 0.65    | 5.81        | -25.66                                 | 23.02                | 5.81                  | 71.17                 | 1.49                                          | 0.38                                           | 4.60                                           |
| LV77   | LV77-19 | 162.63    | 72.15    | 0.33    | 4.60        | -25.55                                 | 25.17                | 4.60                  | 70.23                 | 0.84                                          | 0.15                                           | 2.34                                           |
| LV77   | LV77-20 | 166.87    | 72.90    | 1.07    | 6.99        | -25.51                                 | 24.46                | 6.99                  | 68.55                 | 2.63                                          | 0.75                                           | 7.36                                           |
| LV77   | LV77-21 | 167.49    | 74.13    | 0.88    | 20.53       | -24.29                                 | 34.13                | 20.53                 | 45.34                 | 3.02                                          | 1.82                                           | 4.01                                           |
| LV77   | LV77-22 | 167.83    | 75.18    | 0.96    | 20.60       | -23.78                                 | 41.34                | 20.60                 | 38.06                 | 3.96                                          | 1.97                                           | 3.65                                           |
| LV77   | LV77-23 | 168.10    | 75.85    | 0.96    | 4.67        | -23.00                                 | 61.63                | 4.67                  | 33.70                 | 5.89                                          | 0.45                                           | 3.22                                           |
| LV77   | LV77-24 | 168.51    | 76.60    | 0.62    | 21.40       | -22.94                                 | 52.91                | 21.40                 | 25.69                 | 3.27                                          | 1.32                                           | 1.59                                           |
| LV77   | LV77-25 | 169.25    | 77.81    | 0.51    | 33.17       | -22.81                                 | 48.02                | 33.17                 | 18.81                 | 2.43                                          | 1.68                                           | 0.95                                           |
| LV77   | LV77-26 | 169.55    | 78.49    | 0.57    | 13.63       | -23.81                                 | 44.93                | 13.63                 | 41.44                 | 2.54                                          | 0.77                                           | 2.34                                           |
| LV77   | LV77-27 | 169.76    | 79.15    | 1.63    | 0.00        | -23.05                                 | 63.59                | 0.00                  | 36.41                 | 10.34                                         | 0.00                                           | 5.92                                           |
| LV77   | LV77-28 | 163.49    | 79.19    | 0.41    | 15.90       | -23.23                                 | 51.99                | 15.90                 | 32.11                 | 2.16                                          | 0.66                                           | 1.33                                           |
| LV77   | LV77-29 | 163.28    | 78.85    | 0.66    | 18.82       | -23.07                                 | 52.50                | 18.82                 | 28.68                 | 3.44                                          | 1.23                                           | 1.88                                           |
| LV77   | LV77-30 | 162.05    | 77.90    | 0.62    | 16.17       | -23.08                                 | 53.85                | 16.17                 | 29.98                 | 3.34                                          | 1.00                                           | 1.86                                           |
| LV77   | LV77-31 | 161.31    | 77.24    | 0.32    | 33.09       | -23.47                                 | 38.66                | 33.09                 | 28.25                 | 1.22                                          | 1.04                                           | 0.89                                           |
| LV77   | LV77-32 | 160.25    | 76.50    | 0.80    | 52.33       | -23.65                                 | 25.11                | 52.33                 | 22.56                 | 2.02                                          | 4.21                                           | 1.81                                           |
| LV77   | LV77-33 | 159.26    | 75.85    | 0.94    | 52.12       | -25.20                                 | 3.09                 | 52.12                 | 44.79                 | 0.29                                          | 4.89                                           | 4.20                                           |
| LV77   | LV77-34 | 158.50    | 75.25    | 0.77    | 52.05       | -25.31                                 | 1.56                 | 52.05                 | 46.39                 | 0.12                                          | 4.03                                           | 3.59                                           |
| LV77   | LV77-35 | 157.42    | 74.64    | 0.88    | 37.10       | -25.51                                 | 7.29                 | 37.10                 | 55.61                 | 0.64                                          | 3.27                                           | 4.90                                           |
| LV77   | LV77-36 | 155.65    | 74.10    | 0.92    | 12.84       | -25.46                                 | 21.86                | 12.84                 | 65.30                 | 2.00                                          | 1.18                                           | 5.98                                           |
| LV77   | LV77-38 | 159.77    | 72.56    | 0.68    | 9.56        | -26.00                                 | 15.99                | 9.56                  | 74.45                 | 1.09                                          | 0.65                                           | 5.05                                           |
| LV77   | LV77-39 | 157.34    | 72.87    | 0.37    | 18.75       | -25.51                                 | 17.71                | 18.75                 | 63.54                 | 0.65                                          | 0.69                                           | 2.33                                           |
| LV77   | LV77-40 | 153.25    | 71.90    | 0.96    | 0.93        | -26.40                                 | 15.18                | 0.93                  | 83.89                 | 1.46                                          | 0.09                                           | 8.08                                           |
| LV77   | LV77-41 | 154.13    | 72.55    | 0.75    | 2.02        | -27.12                                 | 4.35                 | 2.02                  | 93.63                 | 0.33                                          | 0.15                                           | 7.05                                           |

| Cruise | Station | Longitude | Latitude | TOC (%) | H-Print (%) | $\delta^{13}\text{C}_{\text{org}}$ (‰) | $f_{\text{sym}}$ (%) | $f_{\text{pela}}$ (%) | $f_{\text{terr}}$ (%) | $\text{OC}_{\text{sym}}$ ( $\text{mg g}^{-1}$ d. w.) | $\text{OC}_{\text{pela}}$ ( $\text{mg g}^{-1}$ d. w.) | $\text{OC}_{\text{terr}}$ ( $\text{mg g}^{-1}$ d. w.) |
|--------|---------|-----------|----------|---------|-------------|----------------------------------------|----------------------|-----------------------|-----------------------|------------------------------------------------------|-------------------------------------------------------|-------------------------------------------------------|
| LV77   | LV77-42 | 155.19    | 73.16    | 1.22    | 4.95        | -25.77                                 | 21.94                | 4.95                  | 73.11                 | 2.67                                                 | 0.60                                                  | 8.88                                                  |
| LV77   | LV77-43 | 153.16    | 73.37    | 0.78    | 0.91        | -25.45                                 | 28.77                | 0.91                  | 70.32                 | 2.23                                                 | 0.07                                                  | 5.45                                                  |
| LV77   | LV77-44 | 151.19    | 73.54    | 0.60    | 2.21        | -25.39                                 | 28.85                | 2.21                  | 68.94                 | 1.72                                                 | 0.13                                                  | 4.10                                                  |
| LV77   | LV77-45 | 148.50    | 73.70    | 0.69    | 1.56        | -26.18                                 | 17.97                | 1.56                  | 80.47                 | 1.24                                                 | 0.11                                                  | 5.54                                                  |
| ARC11  | 20Z4    | -166.61   | 73.54    | 1.78    | 20.31       | -22.89                                 | 54.25                | 20.31                 | 25.44                 | 9.63                                                 | 3.61                                                  | 4.52                                                  |
| ARC11  | 20Z3    | -167.16   | 74.34    | 0.78    | 20.85       | -22.52                                 | 59.24                | 20.85                 | 19.91                 | 4.64                                                 | 1.63                                                  | 1.56                                                  |
| ARC11  | 20P1-6  | -166.62   | 75.44    | 0.69    | 48.04       | -23.13                                 | 34.98                | 48.04                 | 16.98                 | 2.40                                                 | 3.30                                                  | 1.16                                                  |
| ARC11  | 20P2-5  | -163.68   | 76.60    | 0.87    | 9.09        | -22.73                                 | 62.99                | 9.09                  | 27.92                 | 5.45                                                 | 0.79                                                  | 2.42                                                  |
| ARC11  | 20E2    | 179.99    | 75.84    | 0.57    | 0.00        | -22.99                                 | 64.44                | 0.00                  | 35.56                 | 3.66                                                 | 0.00                                                  | 2.02                                                  |
| ARC11  | 20E1    | -179.89   | 75.01    | 1.23    | 5.70        | -23.72                                 | 50.73                | 5.70                  | 43.57                 | 6.25                                                 | 0.70                                                  | 5.37                                                  |
| ARC11  | 20R2    | -168.92   | 75.61    | 0.96    | 31.02       | -22.64                                 | 51.70                | 31.02                 | 17.28                 | 4.96                                                 | 2.97                                                  | 1.66                                                  |
| ARC11  | 20R1    | -169.13   | 74.64    | 0.76    | 9.51        | -22.02                                 | 72.85                | 9.51                  | 17.64                 | 5.53                                                 | 0.72                                                  | 1.34                                                  |
| ARC11  | 20R5    | -168.94   | 77.76    | 1.18    | 0.00        | -23.54                                 | 56.63                | 0.00                  | 43.37                 | 6.66                                                 | 0.00                                                  | 5.10                                                  |
| ARC06  | 14R14   | -160.43   | 78.63    | 0.45    | 0.00        | -23.10                                 | 62.86                | 0.00                  | 37.14                 | 2.83                                                 | 0.00                                                  | 1.67                                                  |
| ARC06  | 14R12   | -163.89   | 77.00    | 0.50    | 0.00        | -22.70                                 | 68.57                | 0.00                  | 31.43                 | 3.43                                                 | 0.00                                                  | 1.57                                                  |
| ARC06  | 14R11   | -166.20   | 76.15    | 0.79    | 0.00        | -21.60                                 | 84.29                | 0.00                  | 15.71                 | 6.66                                                 | 0.00                                                  | 1.24                                                  |
| ARC06  | 14R10   | -167.90   | 75.43    | 0.56    | 0.00        | -23.80                                 | 52.86                | 0.00                  | 47.14                 | 2.96                                                 | 0.00                                                  | 2.64                                                  |
| ARC06  | 14R09   | -169.03   | 74.61    | 1.33    | 6.90        | -21.90                                 | 76.06                | 6.90                  | 17.04                 | 10.12                                                | 0.92                                                  | 2.27                                                  |
| ARC06  | 14R08   | -169.00   | 74.00    | 1.27    | 4.49        | -22.30                                 | 71.72                | 4.49                  | 23.79                 | 9.11                                                 | 0.57                                                  | 3.02                                                  |
| ARC06  | 14R07   | -168.97   | 73.00    | 1.47    | 2.34        | -22.00                                 | 77.23                | 2.34                  | 20.43                 | 11.35                                                | 0.34                                                  | 3.00                                                  |
| ARC06  | 14R03   | -169.05   | 68.62    | 1.11    | 13.33       | -22.70                                 | 60.95                | 13.33                 | 25.72                 | 6.77                                                 | 1.48                                                  | 2.85                                                  |
| ARC06  | 14S03   | -157.08   | 72.24    | 1.75    | 19.24       | -22.80                                 | 56.15                | 19.24                 | 24.61                 | 9.83                                                 | 3.37                                                  | 4.31                                                  |
| ARC06  | 14S02   | -157.46   | 71.92    | 1.72    | 15.58       | -22.70                                 | 59.67                | 15.58                 | 24.75                 | 10.26                                                | 2.68                                                  | 4.26                                                  |
| ARC06  | 14S01   | -157.93   | 71.62    | 1.07    | 1.67        | -22.80                                 | 66.19                | 1.67                  | 32.14                 | 7.08                                                 | 0.18                                                  | 3.44                                                  |
| ARC06  | 14C04   | -166.99   | 71.01    | 1.28    | 4.94        | -20.90                                 | 91.46                | 4.94                  | 3.60                  | 11.71                                                | 0.63                                                  | 0.46                                                  |
| ARC06  | 14C01   | -168.14   | 69.22    | 0.89    | 11.11       | -23.60                                 | 49.37                | 11.11                 | 39.52                 | 4.39                                                 | 0.99                                                  | 3.52                                                  |
| ARC06  | 14C03   | -166.48   | 69.03    | 1.06    | 2.90        | -24.40                                 | 42.63                | 2.90                  | 54.47                 | 4.52                                                 | 0.31                                                  | 5.77                                                  |
| ARC06  | 14C13-5 | -159.18   | 75.20    | 0.75    | 0.00        | -22.60                                 | 70.00                | 0.00                  | 30.00                 | 5.25                                                 | 0.00                                                  | 2.25                                                  |
| ARC06  | 14CC6   | -167.13   | 68.24    | 0.60    | 18.31       | -24.00                                 | 39.54                | 18.31                 | 42.15                 | 2.37                                                 | 1.10                                                  | 2.53                                                  |
| ARC06  | 14CC4   | -167.51   | 68.13    | 0.58    | 19.30       | -23.50                                 | 46.11                | 19.30                 | 34.59                 | 2.67                                                 | 1.12                                                  | 2.01                                                  |
| ARC06  | 14CC3   | -167.90   | 68.10    | 0.38    | 12.50       | -22.90                                 | 58.57                | 12.50                 | 28.93                 | 2.23                                                 | 0.48                                                  | 1.10                                                  |
| ARC06  | 14CC2   | -168.24   | 67.90    | 0.53    | 15.56       | -23.20                                 | 52.54                | 15.56                 | 31.90                 | 2.78                                                 | 0.82                                                  | 1.69                                                  |
| ARC03  | 08R15   | -169.01   | 73.99    | 1.18    | 0.00        | -24.76                                 | 39.14                | 0.00                  | 60.86                 | 4.62                                                 | 0.00                                                  | 7.18                                                  |
| ARC03  | 08R11   | -168.98   | 72.00    | 1.71    | 0.00        | -22.94                                 | 65.14                | 0.00                  | 34.86                 | 11.14                                                | 0.00                                                  | 5.96                                                  |
| ARC03  | 08R09   | -168.97   | 70.99    | 1.33    | 6.90        | -23.43                                 | 54.20                | 6.90                  | 38.90                 | 7.21                                                 | 0.92                                                  | 5.17                                                  |
| ARC03  | 08R03   | -169.02   | 68.00    | 1.68    | 18.18       | -22.71                                 | 58.04                | 18.18                 | 23.78                 | 9.75                                                 | 3.05                                                  | 4.00                                                  |
| ARC03  | 08R01   | -169.00   | 67.00    | 0.73    | 17.50       | -23.86                                 | 42.00                | 17.50                 | 40.50                 | 3.07                                                 | 1.28                                                  | 2.96                                                  |
| ARC03  | 08M07   | -171.99   | 75.01    | 1.11    | 0.00        | -22.64                                 | 69.43                | 0.00                  | 30.57                 | 7.71                                                 | 0.00                                                  | 3.39                                                  |
| ARC03  | 08S14   | -157.92   | 73.17    | 1.27    | 0.00        | -23.87                                 | 51.86                | 0.00                  | 48.14                 | 6.59                                                 | 0.00                                                  | 6.11                                                  |
| ARC03  | 08B11   | -165.03   | 75.00    | 1.18    | 0.00        | -23.60                                 | 55.71                | 0.00                  | 44.29                 | 6.57                                                 | 0.00                                                  | 5.23                                                  |
| ARC03  | 08C33   | -167.51   | 68.92    | 1.17    | 4.00        | -24.15                                 | 45.57                | 4.00                  | 50.43                 | 5.33                                                 | 0.47                                                  | 5.90                                                  |

| Cruise | Station | Longitude | Latitude | TOC<br>(%) | H-<br>Print<br>(%) | $\delta^{13}\text{C}_{\text{org}}$<br>(‰) | $f_{\text{sym}}$<br>(%) | $f_{\text{pela}}$<br>(%) | $f_{\text{terr}}$<br>(%) | $\text{OC}_{\text{sym}}$<br>(mg g <sup>-1</sup><br>d. w.) | $\text{OC}_{\text{pela}}$<br>(mg g <sup>-1</sup><br>d. w.) | $\text{OC}_{\text{terr}}$<br>(mg g <sup>-1</sup><br>d. w.) |
|--------|---------|-----------|----------|------------|--------------------|-------------------------------------------|-------------------------|--------------------------|--------------------------|-----------------------------------------------------------|------------------------------------------------------------|------------------------------------------------------------|
| ARC03  | 08C35   | -166.51   | 68.92    | 1.55       | 3.64               | -24.79                                    | 36.63                   | 3.64                     | 59.73                    | 5.68                                                      | 0.56                                                       | 9.26                                                       |
| ARC03  | 08C13   | -166.75   | 71.80    | 1.45       | 5.89               | -23.40                                    | 55.21                   | 5.89                     | 38.90                    | 8.01                                                      | 0.85                                                       | 5.64                                                       |
| ARC03  | 08C17   | -161.98   | 71.49    | 1.49       | 2.58               | -24.18                                    | 45.95                   | 2.58                     | 51.47                    | 6.85                                                      | 0.38                                                       | 7.67                                                       |
| ARC03  | 08C19   | -159.98   | 71.45    | 1.19       | 2.09               | -23.77                                    | 52.09                   | 2.09                     | 45.82                    | 6.20                                                      | 0.25                                                       | 5.45                                                       |

## References

Bai, Y., Sicre, M.-A., Ren, J., Jalali, B., Klein, V., Li, H., Lin, L., Ji, Z., Su, L., Zhu, Q., Jin, H. and Chen, J.: Centennial-scale variability of sea-ice cover in the Chukchi Sea since AD 1850 based on biomarker reconstruction, *Environ. Res. Lett.*, 17, 4, <https://doi.org/10.1088/1748-9326/ac5f92>, 2022.

Kim, J. -H., Gal, J. -K., Jun, S. -Y., Smik, L., Kim, D., Belt, S. T., Park, K., Shin, K. -H. and Nam, S. -I.: Reconstructing spring sea ice concentration in the Chukchi Sea over recent centuries: insights into the application of the PIP<sub>25</sub> index, *Environ. Res. Lett.*, 14(12), 125004, <https://doi.org/10.1088/1748-9326/ab4b6e>, 2019.

Smik, L., Cabedo-Sanz, P. and Belt, S. T.: Semi-quantitative estimates of paleo Arctic sea ice concentration based on source-specific highly branched isoprenoid alkenes: a further development of the PIP<sub>25</sub> index, *Org. Geochem.*, 92, 63-69, <https://doi.org/10.1016/j.orggeochem.2015.12.007>, 2016.

Walsh, J. E., Fetterer, F., Scott Stewart, J. and Chapman, W. L.: A database for depicting Arctic sea ice variations back to 1850, *Geogr. Rev.*, 107(1), 89-107, <https://doi.org/10.1111/j.1931-0846.2016.12195.x>, 2017.

Xiao, X., Fahl, K., Müller, J. and Stein, R.: Sea-ice distribution in the modern Arctic Ocean: Biomarker records from trans-Arctic Ocean surface sediments, *Geochim. Cosmochim. Acta*, 155, 16-29, <https://doi.org/10.1016/j.gca.2015.01.029>, 2015a.
